# Supplementary material
Source: PubMed Central journal article supplement (PMC5965696)
Supplement: NIHMS960027-supplement.pdf [file NIHMS960027-supplement.pdf]

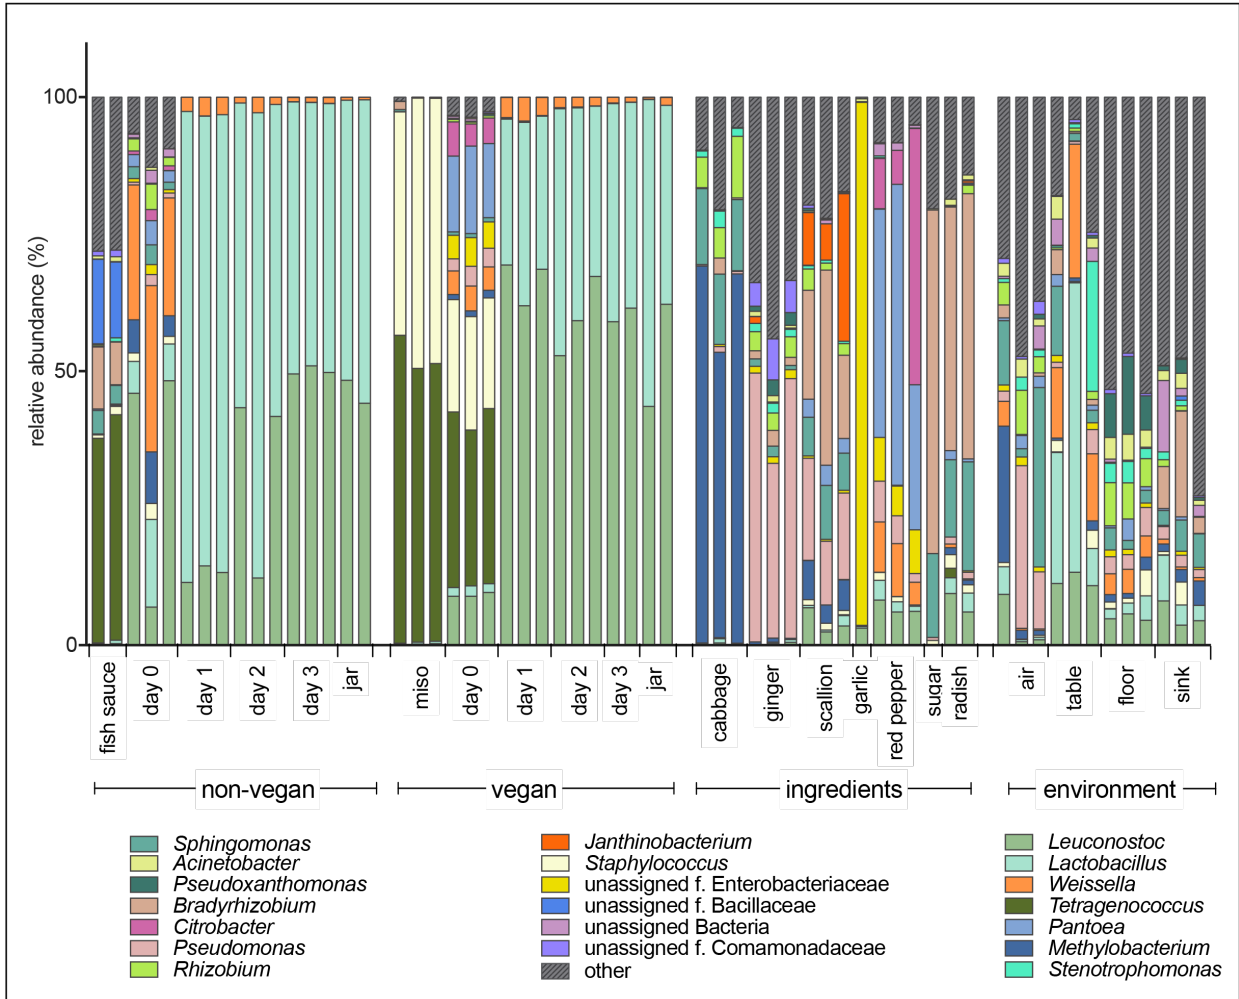

**S1. Relative abundance (%) of bacterial genera in individual kimchi, ingredient, and environment sample.** Relative abundances are from un-averaged triplicate samples.

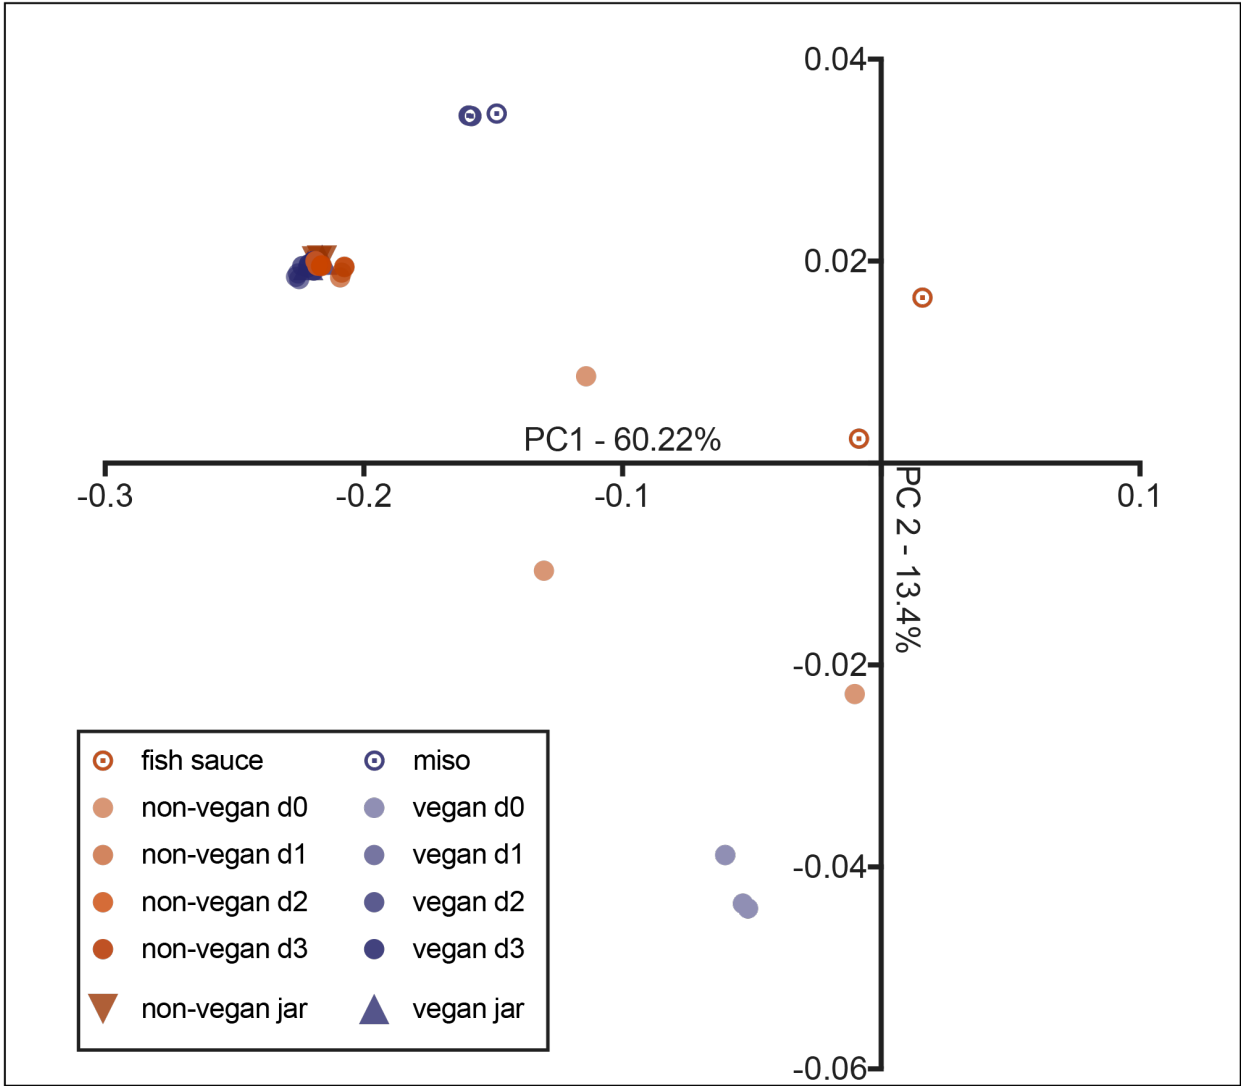

**S2. Simplified version of Fig. 1B PCoA depicting weighted-UniFrac distance of kimchi fermenting samples along with final product, fish sauce, and miso samples.**

|               |            | <i>Leuconostoc</i> |        | <i>Lactobacillus</i> |        | <i>Tetragenococcus</i> |        | <i>Weissella</i> |        | Total |       |
|---------------|------------|--------------------|--------|----------------------|--------|------------------------|--------|------------------|--------|-------|-------|
|               |            | N                  | % OTUs | SD                   | % OTUs | SD                     | % OTUs | SD               | % OTUs |       | SD    |
| Non-Vegan     | Fish Sauce | 2                  | 0.32   | 0.00                 | 0.34   | 0.00                   | 39.25  | 0.03             | 0.04   | 0.00  | 39.96 |
|               | Day 0      | 3                  | 33.72  | 0.23                 | 9.52   | 0.06                   | 0.00   | 0.00             | 25.49  | 0.04  | 68.74 |
|               | Day 1      | 3                  | 13.06  | 0.02                 | 83.84  | 0.02                   | 0.00   | 0.00             | 3.07   | 0.00  | 99.98 |
|               | Day 2      | 3                  | 32.45  | 0.17                 | 65.80  | 0.17                   | 0.00   | 0.00             | 1.74   | 0.01  | 99.99 |
|               | Day 3      | 3                  | 50.08  | 0.01                 | 48.92  | 0.01                   | 0.00   | 0.00             | 0.91   | 0.00  | 99.91 |
|               | Jar        | 2                  | 46.24  | 0.03                 | 53.24  | 0.03                   | 0.00   | 0.00             | 0.49   | 0.00  | 99.97 |
| Vegan         | Miso Paste | 3                  | 0.21   | 0.00                 | 0.33   | 0.00                   | 52.28  | 0.03             | 0.05   | 0.00  | 52.87 |
|               | Day 0      | 3                  | 9.16   | 0.00                 | 1.70   | 0.00                   | 30.80  | 0.02             | 4.37   | 0.00  | 46.03 |
|               | Day 1      | 3                  | 66.63  | 0.04                 | 29.35  | 0.04                   | 0.16   | 0.00             | 3.79   | 0.01  | 99.94 |
|               | Day 2      | 3                  | 59.78  | 0.07                 | 38.33  | 0.07                   | 0.10   | 0.00             | 1.75   | 0.00  | 99.96 |
|               | Day 3      | 2                  | 60.28  | 0.02                 | 38.65  | 0.02                   | 0.06   | 0.00             | 0.95   | 0.00  | 99.94 |
|               | Jar        | 2                  | 52.88  | 0.13                 | 46.15  | 0.14                   | 0.04   | 0.00             | 0.90   | 0.01  | 99.98 |
| Ingredients   | Cabbage    | 3                  | 0.27   | 0.00                 | 0.39   | 0.00                   | 0.02   | 0.00             | 0.00   | 0.00  | 0.68  |
|               | Ginger     | 3                  | 0.29   | 0.00                 | 0.25   | 0.00                   | 0.00   | 0.00             | 0.00   | 0.00  | 0.54  |
|               | Scallion   | 3                  | 4.25   | 0.02                 | 0.90   | 0.01                   | 0.04   | 0.00             | 0.04   | 0.00  | 5.23  |
|               | Garlic     | 1                  | 3.11   | ~                    | 0.32   | ~                      | 0.00   | ~                | 0.21   | ~     | 3.64  |
|               | Red Pepper | 3                  | 6.82   | 0.01                 | 2.13   | 0.01                   | 0.00   | 0.00             | 7.65   | 0.03  | 16.60 |
|               | Sugar      | 1                  | 0.12   | ~                    | 0.00   | ~                      | 0.00   | ~                | 0.00   | ~     | 0.12  |
|               | Radish     | 2                  | 7.74   | 0.02                 | 3.15   | 0.00                   | 0.87   | 0.01             | 0.45   | 0.00  | 12.22 |
| Environmental | Table      | 3                  | 3.63   | 0.05                 | 1.95   | 0.03                   | 0.00   | 0.00             | 1.73   | 0.02  | 7.31  |
|               | Sink       | 3                  | 11.82  | 0.01                 | 27.82  | 0.23                   | 0.05   | 0.00             | 16.51  | 0.07  | 56.21 |
|               | Floor      | 3                  | 5.03   | 0.01                 | 2.74   | 0.01                   | 0.02   | 0.00             | 4.02   | 0.00  | 11.81 |
|               | Air        | 3                  | 5.41   | 0.02                 | 4.94   | 0.03                   | 0.03   | 0.00             | 0.65   | 0.00  | 11.02 |

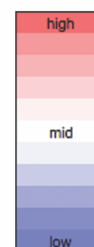

**S3. Tabular comparison of the predominant LAB across all sample types.** Predominant LAB genera include *Tetragenococcus*, *Leuconostoc*, *Lactobacillus*, and *Weissella*, expressed as a percentage of total OTUs.
